# Supplementary material for: A theoretical study of the nornicotine-catalyzed Mannich reaction in wet solvents and water
Source: Royal Society of Chemistry journal article supplement (doi:10.1039/c4gc01021c), 2014-01-01
Supplement: c4gc01021c1.pdf [file c4gc01021c1.pdf]

## A Theoretical Study of the Nornicotine-Catalyzed Mannich Reaction in Wet Solvents and Water

S.C. Yang<sup>‡</sup>, T. Lankau<sup>‡</sup>, C.H. Yu

<sup>‡</sup> These authors contributed equally to this work.

Supplementary Material

### S.1 Gauging DFT functionals

#### S.1.1 Complete Model

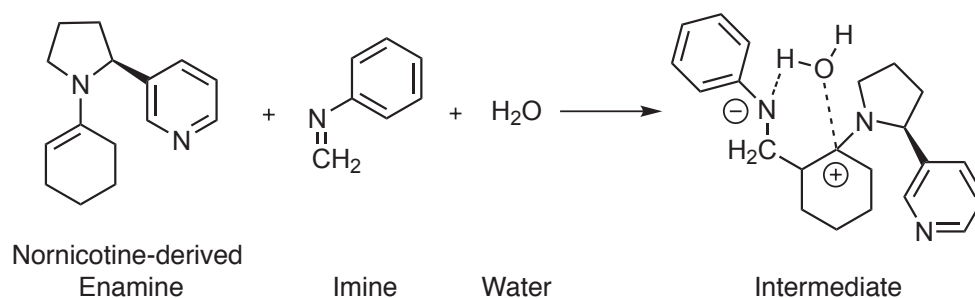

Scheme S.1: Reaction scheme of the complete model.

$$\Delta E = E_{\text{Intermediate}} - E_{\text{Nornicotine-derived Enamine}} - E_{\text{Imine}} - E_{\text{Water}} \quad (\text{S.1})$$

| Method            | $\Delta E$ (kcal/mol) |
|-------------------|-----------------------|
| MP2/Def2-TZVPP    | -4.45                 |
| M06-2X/Def2-TZVPP | -0.99                 |
| B3LYP/Def2-TZVPP  | 17.61                 |
| BMK/Def2-TZVPP    | 7.32                  |

Table S.1:  $\Delta E$  calculated by single point at several computational levels with the basis set Def2-TZVPP and geometry optimized at the M06-2X/Def-SVP level

| Method            | $\Delta E$ (kcal/mol) |
|-------------------|-----------------------|
| MP2/Def2-TZVPP    | -2.90                 |
| M06-2X/Def2-TZVPP | 0.59                  |
| B3LYP/Def2-TZVPP  | 13.15                 |
| BMK/Def2-TZVPP    | 6.28                  |

Table S.2:  $\Delta E$  calculated from single point calculations with selected methods all using the Def2-TZVPP basis set. Geometries from B3LYP/Def-SVP optimisations.

| Method            | $\Delta E$ (kcal/mol) |
|-------------------|-----------------------|
| MP2/Def2-TZVPP    | -4.45                 |
| M06-2X/Def2-TZVPP | -0.99                 |
| B3LYP/Def2-TZVPP  | 17.61                 |
| BMK/Def2-TZVPP    | 7.32                  |

Table S.3:  $\Delta E$  calculated from single point calculations with selected methods using geometries from M06-2X/Def-SVP optimisations.

| Method              | $\Delta E$ (kcal/mol) |
|---------------------|-----------------------|
| MP2/6-31++G(d,p)    | -5.34                 |
| MP2/6-311++G(d,p)   | -5.83                 |
| MP2/6-311++G(2d,2p) | -5.70                 |
| M06-2X/6-31++G(d,p) | -4.66                 |

Table S.4:  $\Delta E$  calculated from single point calculations with selected methods using geometries from M06-2X/Def-SVP optimisations.

### S.1.2 Simplified Model

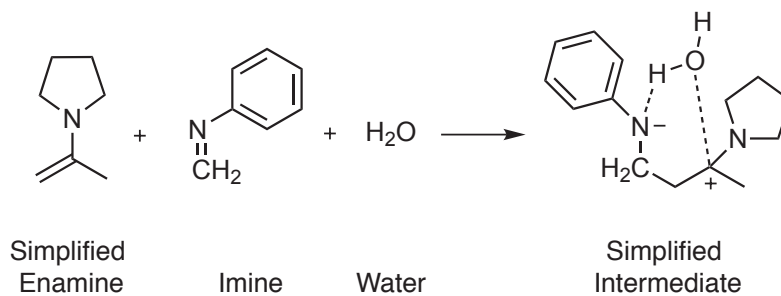

Scheme S.2: Reaction scheme for the simplified model.

$$\Delta E_s = E_{\text{Simplified Intermediate}} - E_{\text{Simplified Enamine}} - E_{\text{Imine}} - E_{\text{Water}} \quad (\text{S.2})$$

| Method            | $\Delta E_s$ (kcal/mol) |
|-------------------|-------------------------|
| MP2/Def2-TZVPP    | -13.36                  |
| M06-2X/Def2-TZVPP | -9.45                   |
| B3LYP/Def2-TZVPP  | 9.38                    |
| BMK/Def2-TZVPP    | -1.00                   |

Table S.5:  $\Delta E_s$  from single point calculations using geometries optimised at the MP2/Def-SVP level.

| Method                 | $\Delta E_s$ (kcal/mol) |
|------------------------|-------------------------|
| MP2/6-311++G(2d,2p)    | -13.95                  |
| M06-2X/6-311++G(2d,2p) | -9.95                   |
| B3LYP/6-311++G(2d,2p)  | 9.09                    |
| BMK/6-311++G(2d,2p)    | -1.40                   |

Table S.6:  $\Delta E_s$  from single point calculations using geometries optimised at the MP2/Def-SVP level.

| Method            | $\Delta E_s$ (kcal/mol) |
|-------------------|-------------------------|
| MP2/Def2-TZVPP    | -13.36                  |
| M06-2X/Def2-TZVPP | -9.45                   |
| B3LYP/Def2-TZVPP  | 9.38                    |
| BMK/Def2-TZVPP    | -1.00                   |

Table S.7:  $\Delta E$  calculated from single point calculations with selected methods using geometries from MP2/Def-SVP optimisations.

| Method              | $\Delta E_s$ (kcal/mol) |
|---------------------|-------------------------|
| MP2/6-31++G(d,p)    | -14.42                  |
| MP2/6-311++G(d,p)   | -14.89                  |
| MP2/6-311++G(2d,2p) | -13.95                  |
| M06-2X/6-31++G(d,p) | -13.19                  |

Table S.8:  $\Delta E$  calculated from single point calculations with selected methods using geometries from MP2/Def-SVP optimisations.

## S.2 Barriers in the transition from the E to the Z rotamer

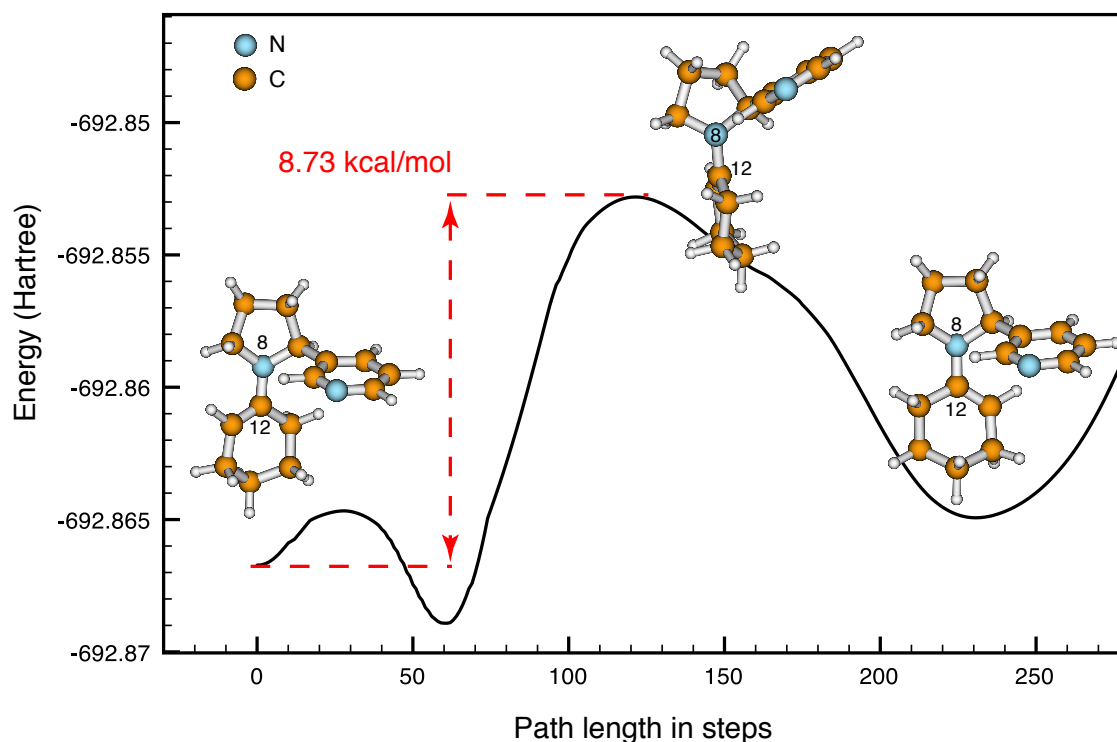

Figure S.1: Reaction path for the rotation of the cyclohexene ring in the nor nicotine-derived enamine at the M06-2X/6-31++G(d,p) level. The E-rotamer is on the left and the Z-rotamer on the right side of the plot.

## S.3 Complete Gaussian 09 reference

M. J. Frisch, G. W. Trucks, H. B. Schlegel, G. E. Scuseria, M. A. Robb, J. R. Cheeseman, G. Scalmani, V. Barone, B. Mennucci, G. A. Petersson, H. Nakatsuji, M. Caricato, X. Li, H. P. Hratchian, A. F. Izmaylov, J. Bloino, G. Zheng, J. L. Sonnenberg, M. Hada, M. Ehara, K. Toyota, R. Fukuda, J. Hasegawa, M. Ishida, T. Nakajima, Y. Honda, O. Kitao, H. Nakai, T. Vreven, J. A. Montgomery, Jr., J. E. Peralta, F. Ogliaro, M. Bearpark, J. J. Heyd, E. Brothers, K. N. Kudin, V. N. Staroverov, T. Keith, R. Kobayashi, J. Normand, K. Raghavachari, A. Rendell, J. C. Burant, S. S. Iyengar, J. Tomasi, M. Cossi, N. Rega, J. M. Millam, M. Klene, J. E. Knox, J. B. Cross, V. Bakken, C. Adamo, J. Jaramillo, R. Gomperts, R. E. Stratmann, O. Yazyev, A. J. Austin, R. Cammi, C. Pomelli, J. W. Ochterski, R. L. Martin, K. Morokuma, V. G. Zakrzewski, G. A. Voth, P. Salvador, J. J. Dannenberg, S. Dapprich, A. D. Daniels, O. Farkas, J. B. Foresman, J. V. Ortiz, J. Cioslowski, D. J. Fox, Gaussian 09, Revision B.01, Gaussian Inc., Wallingford CT, 2010

## S.4 Selected computational data

### S.4.1 NE1 in DMSO

|   | X [Angs]  | Y [Angs]  | Z [Angs]  | q_Mul [e] |
|---|-----------|-----------|-----------|-----------|
| C | 4.016432  | -1.762098 | -0.894042 | -0.398942 |
| C | 3.730590  | -0.623748 | -1.875825 | -0.493323 |
| C | 2.495964  | 0.183859  | -1.436012 | 0.282056  |
| C | 2.668967  | 0.667237  | -0.016644 | -0.459963 |
| C | 3.017209  | -0.397106 | 0.992450  | 0.017766  |
| C | 4.229014  | -1.221549 | 0.521282  | -0.386117 |
| H | 2.308938  | 1.038902  | -2.091311 | 0.166156  |
| H | 4.603124  | 0.040053  | -1.927871 | 0.164742  |
| H | 3.564215  | -1.013309 | -2.884535 | 0.193168  |
| H | 3.169695  | -2.462112 | -0.894219 | 0.149174  |
| H | 4.899063  | -2.324098 | -1.215920 | 0.174690  |
| H | 3.191111  | 0.070302  | 1.964953  | 0.171761  |
| H | 2.134985  | -1.047900 | 1.068480  | 0.224644  |
| H | 5.124879  | -0.587858 | 0.536186  | 0.166800  |
| H | 4.404272  | -2.038258 | 1.227796  | 0.192361  |
| H | 1.613045  | -0.466985 | -1.450365 | 0.240516  |
| O | 2.598336  | 1.852347  | 0.287321  | -0.404792 |
| C | -1.137119 | 0.139998  | 2.591044  | -0.380993 |
| C | -1.072441 | -1.216173 | 1.882526  | -0.287552 |
| C | -1.016414 | -0.809784 | 0.396445  | -0.789908 |
| C | -0.197848 | 1.012877  | 1.744362  | -0.043826 |
| H | -2.160173 | 0.530389  | 2.554816  | 0.186902  |
| H | -0.834119 | 0.088914  | 3.639279  | 0.183590  |
| H | -1.916419 | -1.873213 | 2.106395  | 0.183490  |
| H | -0.146042 | -1.739621 | 2.144163  | 0.165239  |
| H | -0.558010 | -1.611087 | -0.200098 | 0.144921  |
| H | 0.809646  | 1.045112  | 2.181544  | 0.162679  |
| H | -0.550795 | 2.047494  | 1.664704  | 0.150243  |
| N | -0.139266 | 0.357932  | 0.422262  | -0.453367 |
| C | -2.409448 | -0.564465 | -0.161452 | 0.460930  |
| C | -2.991636 | 0.705041  | -0.198613 | -0.780510 |
| C | -4.464223 | -1.391565 | -1.108093 | -0.098032 |
| H | -2.431338 | 1.572502  | 0.147313  | 0.241977  |
| H | -5.084564 | -2.197313 | -1.485410 | 0.185183  |
| C | -3.179024 | -1.629513 | -0.636466 | 0.143954  |
| H | -2.768279 | -2.637095 | -0.637256 | 0.183845  |
| C | -4.945657 | -0.082536 | -1.091664 | -0.113299 |
| H | -5.946444 | 0.141055  | -1.452723 | 0.180547  |
| N | -4.228417 | 0.953565  | -0.648343 | -0.105148 |

|   |           |          |           |           |
|---|-----------|----------|-----------|-----------|
| H | -0.300108 | 1.012292 | -0.338352 | 0.406231  |
| O | 0.316424  | 3.014160 | -0.912290 | -0.799715 |
| H | 1.199099  | 2.760156 | -0.586405 | 0.460113  |
| H | 0.463723  | 3.476299 | -1.744645 | 0.411809  |

E(RM062X) = -845.694698366

frequencies 5.0988 22.8801 26.8667 44.4993 49.3560 61.1627

#### S.4.2 NE-ts12 in DMSO

|   | X [Angs]  | Y [Angs]  | Z [Angs]  | q_Mul [e] |
|---|-----------|-----------|-----------|-----------|
| C | -3.230627 | -2.118741 | -0.611129 | -0.373559 |
| C | -2.271085 | -2.233011 | 0.574026  | -0.566332 |
| C | -1.081788 | -1.287515 | 0.388555  | 0.806907  |
| C | -1.581691 | 0.161249  | 0.251870  | -1.684787 |
| C | -2.532997 | 0.299628  | -0.936439 | 0.467656  |
| C | -3.707703 | -0.675888 | -0.781453 | -0.514578 |
| H | -0.392136 | -1.342407 | 1.239610  | 0.169148  |
| H | -2.797916 | -1.973843 | 1.499841  | 0.174526  |
| H | -1.906944 | -3.259955 | 0.680059  | 0.180119  |
| H | -2.715327 | -2.444079 | -1.526266 | 0.153908  |
| H | -4.088965 | -2.784946 | -0.473276 | 0.156274  |
| H | -2.916517 | 1.322409  | -0.981950 | 0.160528  |
| H | -2.008050 | 0.089666  | -1.877607 | 0.148652  |
| H | -4.291072 | -0.382378 | 0.099124  | 0.172512  |
| H | -4.366026 | -0.587873 | -1.651743 | 0.173372  |
| H | -0.532885 | -1.594548 | -0.509825 | 0.117158  |
| O | -2.155953 | 0.620159  | 1.403483  | -0.479166 |
| C | 0.750001  | 3.074219  | -0.566449 | -0.370857 |
| C | 1.180482  | 2.035936  | -1.605616 | -0.357872 |
| C | 0.684763  | 0.680702  | -1.034746 | -0.208417 |
| C | -0.587285 | 2.520741  | -0.103653 | 0.250884  |
| H | 1.454303  | 3.115216  | 0.271723  | 0.162335  |
| H | 0.657648  | 4.078222  | -0.983587 | 0.220463  |
| H | 2.256322  | 2.019959  | -1.786715 | 0.209535  |
| H | 0.677228  | 2.232277  | -2.556459 | 0.200362  |
| H | 0.138454  | 0.127969  | -1.802215 | 0.198199  |
| H | -1.350019 | 2.657608  | -0.872444 | 0.178409  |
| H | -0.952226 | 2.903290  | 0.848456  | 0.214539  |
| N | -0.302701 | 1.057447  | 0.044901  | -0.827141 |
| C | 1.800039  | -0.196072 | -0.513565 | -0.048213 |
| C | 2.535656  | 0.133717  | 0.629360  | -0.177467 |
| C | 3.239144  | -2.107281 | -0.746305 | 0.032469  |

|   |           |           |           |           |
|---|-----------|-----------|-----------|-----------|
| H | 2.282516  | 1.015596  | 1.215876  | 0.273693  |
| H | 3.551877  | -3.008339 | -1.261859 | 0.194978  |
| C | 2.172701  | -1.345019 | -1.209762 | 0.072521  |
| H | 1.629166  | -1.641977 | -2.103370 | 0.209559  |
| C | 3.899555  | -1.689633 | 0.406813  | -0.221671 |
| H | 4.736246  | -2.260724 | 0.800721  | 0.182065  |
| N | 3.560606  | -0.589721 | 1.088247  | -0.064265 |
| H | 0.126952  | 0.972584  | 1.014847  | 0.385562  |
| O | -0.131408 | 0.827893  | 2.670771  | -0.925147 |
| H | -1.268089 | 0.725467  | 2.165780  | 0.560223  |
| H | -0.045975 | 1.644106  | 3.176191  | 0.392913  |

E(RM062X) = -845.686737004

frequencies -759.8736 33.3740 42.7441 56.4218 88.0569 93.5166

### S.4.3 NE2 in DMSO

|   | X [Angs]  | Y [Angs]  | Z [Angs]  | q_Mul [e] |
|---|-----------|-----------|-----------|-----------|
| C | -3.251532 | -2.107021 | -0.655451 | -0.379891 |
| C | -2.353625 | -2.193376 | 0.579241  | -0.611670 |
| C | -1.137054 | -1.278667 | 0.424937  | 0.785467  |
| C | -1.550581 | 0.180973  | 0.180095  | -2.007992 |
| C | -2.485884 | 0.276470  | -1.033676 | 0.600479  |
| C | -3.690130 | -0.662869 | -0.901230 | -0.523751 |
| H | -0.492179 | -1.317200 | 1.312106  | 0.153194  |
| H | -2.924876 | -1.897128 | 1.467394  | 0.165786  |
| H | -2.016155 | -3.222611 | 0.740472  | 0.174896  |
| H | -2.697016 | -2.473836 | -1.531316 | 0.156466  |
| H | -4.127396 | -2.754173 | -0.536841 | 0.153486  |
| H | -2.831600 | 1.308129  | -1.144958 | 0.160995  |
| H | -1.925181 | 0.017176  | -1.940051 | 0.138862  |
| H | -4.314261 | -0.328367 | -0.063993 | 0.172677  |
| H | -4.302374 | -0.597380 | -1.807023 | 0.165947  |
| H | -0.537986 | -1.632379 | -0.422853 | 0.118573  |
| O | -2.298655 | 0.669512  | 1.279472  | -0.306862 |
| C | 0.726900  | 3.034354  | -0.543280 | -0.371251 |
| C | 1.074989  | 2.004416  | -1.619308 | -0.174229 |
| C | 0.625823  | 0.653189  | -1.009531 | -0.746273 |
| C | -0.580112 | 2.477580  | 0.003171  | 0.367185  |
| H | 1.489858  | 3.059986  | 0.242164  | 0.149748  |
| H | 0.616110  | 4.044806  | -0.942488 | 0.200297  |
| H | 2.129684  | 1.997210  | -1.903213 | 0.194442  |
| H | 0.482986  | 2.205332  | -2.518432 | 0.187832  |

|   |           |           |           |           |
|---|-----------|-----------|-----------|-----------|
| H | 0.122347  | 0.062576  | -1.784276 | 0.114295  |
| H | -1.403526 | 2.722816  | -0.681340 | 0.138707  |
| H | -0.839095 | 2.860029  | 0.993650  | 0.174131  |
| N | -0.327700 | 1.021650  | 0.070545  | -0.564633 |
| C | 1.790246  | -0.180780 | -0.510154 | 0.298208  |
| C | 2.591383  | 0.229843  | 0.560614  | -0.376548 |
| C | 3.242212  | -2.093571 | -0.690913 | -0.020340 |
| H | 2.365293  | 1.155731  | 1.086172  | 0.227314  |
| H | 3.535306  | -3.026635 | -1.159676 | 0.187281  |
| C | 2.141464  | -1.371506 | -1.143513 | 0.113676  |
| H | 1.552337  | -1.733964 | -1.983268 | 0.206653  |
| C | 3.965095  | -1.591074 | 0.387390  | -0.174998 |
| H | 4.830821  | -2.125931 | 0.769690  | 0.179213  |
| N | 3.653322  | -0.446491 | 1.007493  | -0.068102 |
| H | 0.232149  | 0.863585  | 1.838218  | 0.470644  |
| O | 0.121923  | 0.731271  | 2.812369  | -0.708467 |
| H | -1.734892 | 0.623338  | 2.071655  | 0.455489  |
| H | 0.403774  | 1.550983  | 3.235149  | 0.423068  |

E(RM062X) = -845.710105395

frequencies 22.2896 43.3763 74.8481 80.9868 90.8690 115.3604

#### S.4.4 NE-ts23 in DMSO

|   | X [Angs]  | Y [Angs]  | Z [Angs]  | q_Mu1 [e] |
|---|-----------|-----------|-----------|-----------|
| C | -2.964043 | -2.634168 | -0.126396 | -0.376569 |
| C | -2.147999 | -2.255235 | 1.111290  | -0.541332 |
| C | -0.966249 | -1.358703 | 0.735243  | 0.369143  |
| C | -1.424339 | -0.091774 | -0.004374 | -1.242812 |
| C | -2.282632 | -0.463366 | -1.223789 | 0.694091  |
| C | -3.452139 | -1.380566 | -0.854331 | -0.472043 |
| H | -0.402826 | -1.050247 | 1.625052  | 0.168885  |
| H | -2.793294 | -1.724897 | 1.822215  | 0.162159  |
| H | -1.778179 | -3.152868 | 1.618182  | 0.167754  |
| H | -2.334885 | -3.226850 | -0.806122 | 0.156470  |
| H | -3.813502 | -3.265616 | 0.155794  | 0.151508  |
| H | -2.654782 | 0.451883  | -1.694454 | 0.169098  |
| H | -1.640946 | -0.970866 | -1.955987 | 0.144426  |
| H | -4.145577 | -0.832032 | -0.205250 | 0.172490  |
| H | -4.004958 | -1.653404 | -1.759793 | 0.162357  |
| H | -0.274819 | -1.925643 | 0.098796  | 0.148500  |
| O | -2.268897 | 0.673972  | 0.843616  | -0.490020 |
| C | 0.762080  | 2.495392  | -1.506629 | -0.461307 |



|   |           |           |           |           |
|---|-----------|-----------|-----------|-----------|
| C | 1.165871  | 1.186640  | -2.182704 | -0.136543 |
| C | 0.811767  | 0.125792  | -1.115709 | -1.139053 |
| C | -0.543733 | 2.097364  | -0.826688 | 0.171993  |
| H | 1.506487  | 2.785700  | -0.756165 | 0.175125  |
| H | 0.637554  | 3.323654  | -2.207673 | 0.189860  |
| H | 2.214592  | 1.141152  | -2.486520 | 0.170072  |
| H | 0.542828  | 1.023559  | -3.069538 | 0.183078  |
| H | 0.467923  | -0.788084 | -1.618315 | 0.104265  |
| H | -1.364426 | 2.109436  | -1.560602 | 0.115438  |
| H | -0.816807 | 2.762728  | -0.003626 | 0.143027  |
| N | -0.262535 | 0.742707  | -0.321993 | -0.155891 |
| C | 2.019213  | -0.250753 | -0.273535 | 0.414135  |
| C | 2.280246  | 0.336105  | 0.966259  | -0.616640 |
| C | 4.067430  | -1.482490 | 0.016047  | -0.079221 |
| H | 1.568327  | 1.049714  | 1.373091  | 0.248428  |
| H | 4.801405  | -2.206356 | -0.321325 | 0.188245  |
| C | 2.943782  | -1.184107 | -0.746299 | 0.303741  |
| H | 2.780671  | -1.674388 | -1.704070 | 0.202019  |
| C | 4.232892  | -0.829254 | 1.236959  | -0.143401 |
| H | 5.100390  | -1.036645 | 1.858785  | 0.177283  |
| N | 3.359864  | 0.064631  | 1.712101  | -0.081568 |
| H | -2.756938 | 2.843753  | 1.536009  | 0.404092  |
| O | -2.127414 | 3.067756  | 2.234177  | -0.781186 |
| H | -1.737873 | 0.987548  | 1.592877  | 0.435735  |
| H | -2.624058 | 3.578332  | 2.883483  | 0.424171  |

E(RM062X) = -845.701398996

frequencies -44.4676 36.8206 45.9715 54.4280 62.6474 96.7496 114.5256

#### S.4.5 NE3 in DMSO

|   | X [Angs]  | Y [Angs]  | Z [Angs]  | q_Mul [e] |
|---|-----------|-----------|-----------|-----------|
| C | 2.596399  | -2.721758 | 0.669114  | -0.380824 |
| C | 1.661076  | -2.689607 | -0.541379 | -0.522530 |
| C | 0.607382  | -1.590629 | -0.390272 | 0.108237  |
| C | 1.250314  | -0.211897 | -0.183294 | -1.712104 |
| C | 2.219839  | -0.245585 | 1.008735  | 0.900649  |
| C | 3.262407  | -1.360039 | 0.874801  | -0.395673 |
| H | -0.042338 | -1.539237 | -1.272860 | 0.167103  |
| H | 2.247709  | -2.506936 | -1.449832 | 0.161586  |
| H | 1.162676  | -3.656256 | -0.667789 | 0.171132  |
| H | 2.016377  | -2.979702 | 1.566568  | 0.156719  |
| H | 3.355626  | -3.501025 | 0.543354  | 0.157110  |

|   |           |           |           |           |
|---|-----------|-----------|-----------|-----------|
| H | 2.715084  | 0.725645  | 1.104729  | 0.142547  |
| H | 1.629018  | -0.403321 | 1.920686  | 0.145489  |
| H | 3.913481  | -1.140816 | 0.019198  | 0.176867  |
| H | 3.897984  | -1.373975 | 1.766577  | 0.166329  |
| H | -0.035558 | -1.824639 | 0.467294  | 0.140910  |
| O | 2.055161  | 0.100539  | -1.324648 | -0.445587 |
| C | -0.560885 | 2.971630  | 0.383340  | -0.471777 |
| C | -1.083915 | 2.045990  | 1.481569  | -0.143144 |
| C | -0.847668 | 0.631427  | 0.897145  | -1.171603 |
| C | 0.677894  | 2.216528  | -0.082050 | 0.359076  |
| H | -1.285428 | 3.049603  | -0.435119 | 0.179598  |
| H | -0.333469 | 3.977949  | 0.741544  | 0.186860  |
| H | -2.129354 | 2.214431  | 1.750171  | 0.176258  |
| H | -0.473444 | 2.167430  | 2.382981  | 0.186995  |
| H | -0.530890 | -0.040417 | 1.707269  | 0.106383  |
| H | 1.504869  | 2.382791  | 0.625991  | 0.154082  |
| H | 1.020069  | 2.520809  | -1.074904 | 0.161037  |
| N | 0.218790  | 0.818790  | -0.100940 | -0.110037 |
| C | -2.114012 | 0.050067  | 0.293206  | 0.535265  |
| C | -2.454632 | 0.244652  | -1.047436 | -0.528205 |
| C | -4.189950 | -1.146941 | 0.517747  | -0.079864 |
| H | -1.766441 | 0.779827  | -1.697158 | 0.227459  |
| H | -4.905807 | -1.714465 | 1.102493  | 0.190561  |
| C | -3.013087 | -0.667369 | 1.083301  | 0.240047  |
| H | -2.788422 | -0.854024 | 2.131532  | 0.196813  |
| C | -4.431981 | -0.887823 | -0.830396 | -0.176252 |
| H | -5.341693 | -1.246902 | -1.305433 | 0.175153  |
| N | -3.584633 | -0.204990 | -1.607200 | -0.080387 |
| H | 3.342628  | 1.409598  | -1.131235 | 0.471499  |
| O | 4.018911  | 2.099770  | -1.001830 | -0.764265 |
| H | 1.462518  | 0.192939  | -2.085330 | 0.454608  |
| H | 4.858048  | 1.629745  | -0.946703 | 0.385883  |

E(RM062X) = -845.706706692

frequencies 25.2711 39.2584 40.9774 45.5895 68.9107 97.0065

#### S.4.6 NE-ts34 in DMSO

|   | X [Angs]  | Y [Angs]  | Z [Angs]  | q_Mul [e] |
|---|-----------|-----------|-----------|-----------|
| C | -3.944879 | -1.493715 | -0.147682 | -0.504082 |
| C | -2.698632 | -1.924297 | -0.954384 | -0.265427 |
| C | -1.401307 | -1.558318 | -0.207659 | 0.351409  |
| C | -1.350237 | -0.059804 | -0.129233 | -1.714742 |

|   |           |           |           |           |
|---|-----------|-----------|-----------|-----------|
| C | -2.627954 | 0.626006  | 0.277555  | 0.343042  |
| C | -3.620917 | -0.374792 | 0.859534  | -0.406219 |
| H | -1.438806 | -1.941405 | 0.813379  | 0.240662  |
| H | -2.708271 | -3.001319 | -1.139349 | 0.200828  |
| H | -2.690108 | -1.439067 | -1.937622 | 0.193039  |
| H | -4.724306 | -1.156154 | -0.838720 | 0.163215  |
| H | -4.353309 | -2.352840 | 0.393642  | 0.161536  |
| H | -2.396604 | 1.430141  | 0.980956  | 0.171180  |
| H | -3.045974 | 1.090011  | -0.629196 | 0.209789  |
| H | -3.175191 | -0.793438 | 1.766470  | 0.228728  |
| H | -4.535908 | 0.145941  | 1.154612  | 0.172194  |
| H | -0.520086 | -1.979239 | -0.691707 | 0.179125  |
| O | -0.156535 | 2.371994  | 2.231311  | -0.927412 |
| C | 0.855072  | 2.472977  | -1.502538 | -0.371063 |
| C | 1.196128  | 1.244056  | -2.346820 | -0.324032 |
| C | 0.731087  | 0.064122  | -1.474982 | -0.834729 |
| C | -0.494175 | 2.109667  | -0.888162 | 0.121455  |
| H | 1.602014  | 2.623007  | -0.717107 | 0.165252  |
| H | 0.797298  | 3.387799  | -2.094023 | 0.208686  |
| H | 2.255070  | 1.162091  | -2.597895 | 0.200437  |
| H | 0.615801  | 1.251518  | -3.274636 | 0.191484  |
| H | 0.405505  | -0.767526 | -2.104195 | 0.152898  |
| H | -1.322745 | 2.381568  | -1.551508 | 0.173951  |
| H | -0.649893 | 2.539559  | 0.103326  | 0.253683  |
| N | -0.449822 | 0.630401  | -0.776645 | 0.327873  |
| C | 1.794651  | -0.426956 | -0.517420 | 0.695177  |
| C | 2.067201  | 0.221936  | 0.691306  | -0.838637 |
| C | 3.586668  | -1.937644 | 0.010768  | 0.033506  |
| H | 1.462111  | 1.068500  | 1.013534  | 0.268914  |
| H | 4.210178  | -2.795047 | -0.216747 | 0.189178  |
| C | 2.575134  | -1.532241 | -0.853416 | -0.119849 |
| H | 2.390170  | -2.070955 | -1.779913 | 0.202821  |
| C | 3.779288  | -1.217768 | 1.187568  | -0.163681 |
| H | 4.560127  | -1.505939 | 1.886956  | 0.182414  |
| N | 3.037180  | -0.158574 | 1.530492  | -0.009936 |
| H | -0.386158 | 1.325279  | 2.216890  | 0.515692  |
| O | -0.731124 | -0.028095 | 2.091671  | -0.828310 |
| H | -0.102832 | 2.636064  | 3.155571  | 0.405727  |
| H | 0.058908  | -0.571920 | 2.199899  | 0.404220  |

E(RM062X) = -845.662835846

frequencies -210.4355 39.0336 47.6777 57.4457 71.5854 77.9028

#### S.4.7 NE4 in DMSO

|   | X [Angs]  | Y [Angs]  | Z [Angs]  | q_Mul [e] |
|---|-----------|-----------|-----------|-----------|
| C | -3.860318 | -0.814259 | -1.156255 | -0.359729 |
| C | -2.593689 | -1.218121 | -1.942503 | -0.547972 |
| C | -1.286983 | -0.988618 | -1.149776 | 0.132551  |
| C | -1.341988 | 0.247780  | -0.321227 | -0.156389 |
| C | -2.535164 | 0.426152  | 0.563696  | -0.193540 |
| C | -3.571166 | -0.673544 | 0.339625  | -0.452238 |
| H | -1.168431 | -1.775825 | -0.390588 | 0.297228  |
| H | -2.626556 | -2.279703 | -2.200582 | 0.182354  |
| H | -2.541782 | -0.665294 | -2.884383 | 0.177409  |
| H | -4.233030 | 0.148984  | -1.525059 | 0.164823  |
| H | -4.655343 | -1.544780 | -1.327952 | 0.178675  |
| H | -2.159850 | 0.449842  | 1.598541  | 0.281255  |
| H | -2.969919 | 1.413974  | 0.353652  | 0.199756  |
| H | -3.192540 | -1.615131 | 0.752753  | 0.203991  |
| H | -4.482958 | -0.419923 | 0.886867  | 0.179797  |
| H | -0.416681 | -1.025608 | -1.804381 | 0.165881  |
| O | -0.479684 | 0.360400  | 2.940914  | -1.181521 |
| C | 0.986162  | 2.921656  | 0.389460  | -0.321891 |
| C | 1.369319  | 2.517447  | -1.035030 | -0.346070 |
| C | 0.828427  | 1.083625  | -1.155370 | -1.060648 |
| C | -0.413979 | 2.337156  | 0.559518  | 0.018594  |
| H | 1.670831  | 2.472382  | 1.115865  | 0.181374  |
| H | 0.992917  | 4.002140  | 0.537879  | 0.209717  |
| H | 2.442535  | 2.553835  | -1.229317 | 0.204173  |
| H | 0.859799  | 3.157077  | -1.762314 | 0.191577  |
| H | 0.543622  | 0.853351  | -2.184412 | 0.186704  |
| H | -1.188840 | 3.017400  | 0.190575  | 0.198872  |
| H | -0.630894 | 2.004539  | 1.579782  | 0.263928  |
| N | -0.402775 | 1.137173  | -0.319670 | 0.101323  |
| C | 1.791547  | 0.033157  | -0.644200 | 0.932069  |
| C | 1.815209  | -0.358605 | 0.697503  | -1.114047 |
| C | 3.602705  | -1.494872 | -1.024357 | -0.018375 |
| H | 1.107201  | 0.057492  | 1.418746  | 0.323710  |
| H | 4.326711  | -1.975824 | -1.672549 | 0.188934  |
| C | 2.707927  | -0.552225 | -1.517781 | -0.118861 |
| H | 2.715762  | -0.279276 | -2.570499 | 0.202348  |
| C | 3.542243  | -1.821405 | 0.329785  | -0.102706 |
| H | 4.223024  | -2.559129 | 0.746802  | 0.185107  |
| N | 2.669936  | -1.271064 | 1.179948  | 0.031304  |
| H | -0.631779 | -0.923499 | 2.388910  | 0.485192  |

|   |           |           |          |           |
|---|-----------|-----------|----------|-----------|
| O | -0.766766 | -1.868434 | 1.898943 | -0.879803 |
| H | -0.244523 | 0.285661  | 3.872549 | 0.393587  |
| H | 0.120698  | -2.223132 | 1.769785 | 0.391556  |

E(RM062X) = -845.666502324

frequencies 35.7705 47.9051 60.4945 73.2016 88.5811 96.1957

#### S.4.8 NE-ts45 in DMSO

|   | X [Angs]  | Y [Angs]  | Z [Angs]  | q_Mul [e] |
|---|-----------|-----------|-----------|-----------|
| C | -3.787035 | -0.204912 | -1.416206 | -0.332688 |
| C | -2.514801 | -0.525717 | -2.220906 | -0.603168 |
| C | -1.231444 | -0.503112 | -1.353478 | 0.245698  |
| C | -1.342181 | 0.460006  | -0.213746 | -0.385112 |
| C | -2.474864 | 0.287582  | 0.667924  | -0.199092 |
| C | -3.593939 | -0.557852 | 0.061613  | -0.430717 |
| H | -1.099985 | -1.479090 | -0.860121 | 0.265953  |
| H | -2.590450 | -1.521648 | -2.666275 | 0.180577  |
| H | -2.400960 | 0.183911  | -3.044925 | 0.169768  |
| H | -4.009355 | 0.867159  | -1.483526 | 0.166633  |
| H | -4.641815 | -0.737181 | -1.844368 | 0.175411  |
| H | -1.902821 | -0.318622 | 1.586067  | 0.415625  |
| H | -2.819459 | 1.227788  | 1.107394  | 0.186081  |
| H | -3.355195 | -1.626490 | 0.154851  | 0.164301  |
| H | -4.516479 | -0.393983 | 0.624858  | 0.177897  |
| H | -0.346253 | -0.337977 | -1.967599 | 0.167160  |
| O | -1.029633 | -1.020178 | 2.499660  | -1.045377 |
| C | 1.004803  | 2.737820  | 1.340329  | -0.421919 |
| C | 1.425134  | 2.797243  | -0.128951 | -0.340506 |
| C | 0.864909  | 1.485024  | -0.703129 | -1.103955 |
| C | -0.411771 | 2.170137  | 1.272317  | 0.078918  |
| H | 1.656317  | 2.056110  | 1.896568  | 0.192917  |
| H | 1.030076  | 3.711855  | 1.830504  | 0.204390  |
| H | 2.504030  | 2.872454  | -0.275037 | 0.194918  |
| H | 0.943877  | 3.643106  | -0.629390 | 0.189444  |
| H | 0.627595  | 1.592033  | -1.764997 | 0.196175  |
| H | -1.163754 | 2.955391  | 1.137453  | 0.203911  |
| H | -0.681275 | 1.551094  | 2.131999  | 0.188010  |
| N | -0.389477 | 1.317053  | 0.063068  | 0.059403  |
| C | 1.800797  | 0.308002  | -0.513379 | 0.858682  |
| C | 1.631186  | -0.630296 | 0.505898  | -1.004694 |
| C | 3.729574  | -0.944654 | -1.207198 | -0.016104 |
| H | 0.800952  | -0.552146 | 1.210088  | 0.337890  |

|   |           |           |           |           |
|---|-----------|-----------|-----------|-----------|
| H | 4.574505  | -1.110790 | -1.866088 | 0.191155  |
| C | 2.879164  | 0.138992  | -1.383913 | -0.025302 |
| H | 3.043608  | 0.844472  | -2.195118 | 0.204624  |
| C | 3.462897  | -1.834954 | -0.166575 | -0.076315 |
| H | 4.097712  | -2.702884 | -0.007605 | 0.186808  |
| N | 2.437085  | -1.688259 | 0.675441  | -0.035490 |
| H | -0.647804 | -2.290510 | 1.662516  | 0.467630  |
| O | -0.370046 | -3.068045 | 1.068954  | -0.844288 |
| H | -1.482102 | -1.246650 | 3.321072  | 0.400738  |
| H | 0.588639  | -2.983032 | 0.979595  | 0.394009  |

E(RM062X) = -845.659446369

frequencies -748.8251 28.6130 39.6523 55.2047 60.4485 74.8603

#### S.4.9 NE5 in DMSO

|   | X [Angs]  | Y [Angs]  | Z [Angs]  | q_Mul [e] |
|---|-----------|-----------|-----------|-----------|
| C | 3.979691  | 0.348529  | -1.508815 | -0.326142 |
| C | 2.667104  | 0.035850  | -2.267182 | -0.629051 |
| C | 1.408270  | 0.256838  | -1.406724 | 0.334801  |
| C | 1.572913  | -0.372824 | -0.042082 | -0.508022 |
| C | 2.719218  | -0.069075 | 0.623720  | 0.153448  |
| C | 3.718730  | 0.826364  | -0.067618 | -0.461497 |
| H | 1.250416  | 1.335646  | -1.264328 | 0.237200  |
| H | 2.583997  | 0.651856  | -3.167583 | 0.176779  |
| H | 2.670242  | -1.006932 | -2.600747 | 0.163611  |
| H | 4.597527  | -0.553987 | -1.461777 | 0.164901  |
| H | 4.561721  | 1.104135  | -2.046723 | 0.161046  |
| H | 1.405511  | 1.381995  | 1.554615  | 0.458603  |
| H | 2.950266  | -0.495109 | 1.595201  | 0.196138  |
| H | 3.353100  | 1.865131  | -0.104939 | 0.166802  |
| H | 4.657441  | 0.854343  | 0.492436  | 0.161813  |
| H | 0.526406  | -0.114784 | -1.931457 | 0.162541  |
| O | 0.828419  | 2.033240  | 1.996263  | -0.772570 |
| C | -0.686690 | -2.408952 | 2.004979  | -0.435538 |
| C | -1.016593 | -2.877251 | 0.586382  | -0.379735 |
| C | -0.558105 | -1.692086 | -0.288853 | -1.555559 |
| C | 0.658143  | -1.708604 | 1.816362  | 0.094269  |
| H | -1.436675 | -1.689754 | 2.352035  | 0.180452  |
| H | -0.635997 | -3.227233 | 2.725439  | 0.193115  |
| H | -2.070993 | -3.118353 | 0.434559  | 0.177084  |
| H | -0.418463 | -3.758600 | 0.333699  | 0.181026  |
| H | -0.225511 | -2.058149 | -1.267916 | 0.169743  |

|   |           |           |           |           |
|---|-----------|-----------|-----------|-----------|
| H | 1.499504  | -2.416161 | 1.887259  | 0.168821  |
| H | 0.829351  | -0.909387 | 2.548958  | 0.153431  |
| N | 0.564738  | -1.151262 | 0.473136  | -0.125803 |
| C | -1.670172 | -0.679502 | -0.512245 | 0.751344  |
| C | -1.695286 | 0.546886  | 0.149211  | -0.674815 |
| C | -3.725627 | -0.015736 | -1.574895 | -0.024093 |
| H | -0.895579 | 0.809876  | 0.840436  | 0.313422  |
| H | -4.549517 | -0.198523 | -2.255707 | 0.192711  |
| C | -2.716605 | -0.954544 | -1.396033 | 0.133494  |
| H | -2.736439 | -1.894496 | -1.943598 | 0.203708  |
| C | -3.653711 | 1.183039  | -0.866066 | -0.079428 |
| H | -4.417850 | 1.945899  | -0.986305 | 0.184853  |
| N | -2.659104 | 1.462935  | -0.020145 | -0.093240 |
| H | -0.517388 | 3.228669  | 1.372470  | 0.418418  |
| O | -1.288447 | 3.746022  | 1.087420  | -0.840074 |
| H | 1.261141  | 2.247605  | 2.831050  | 0.440459  |
| H | -1.909100 | 3.086916  | 0.721682  | 0.411534  |

E(RM062X) = -845.691673513

frequencies 24.5268 36.1077 41.6855 53.4125 58.1993 78.9413

#### S.4.10 AN1 in DMSO - EFS path

|   | X [Angs]  | Y [Angs]  | Z [Angs]  | q_Mul [e] |
|---|-----------|-----------|-----------|-----------|
| C | 0.741658  | -0.221755 | 3.239127  | -0.253737 |
| C | -0.043954 | 1.034200  | 2.860758  | -0.451226 |
| C | -1.235643 | 0.512440  | 2.017577  | -0.725582 |
| C | 0.590150  | -1.076048 | 1.986123  | -0.229761 |
| H | 1.786172  | -0.006667 | 3.477916  | 0.212143  |
| H | 0.281176  | -0.727175 | 4.094262  | 0.176925  |
| H | 0.583192  | 1.674108  | 2.229017  | 0.210082  |
| H | -0.382021 | 1.626980  | 3.713636  | 0.181202  |
| H | -2.132722 | 0.423349  | 2.646284  | 0.158021  |
| H | 0.729667  | -2.147342 | 2.168373  | 0.167915  |
| H | 1.311672  | -0.768284 | 1.211480  | -0.185740 |
| N | -0.787187 | -0.819286 | 1.588010  | -0.010996 |
| C | -1.549638 | 1.478683  | 0.893733  | -0.354843 |
| C | -0.812391 | 1.479318  | -0.294068 | -0.523999 |
| C | -2.762481 | 3.358981  | 0.006490  | -0.054168 |
| H | -0.033363 | 0.733457  | -0.452225 | 0.662322  |
| H | -3.531135 | 4.119824  | 0.084250  | 0.197546  |
| C | -2.548695 | 2.441235  | 1.030951  | -0.054237 |
| H | -3.156337 | 2.467999  | 1.932481  | 0.198475  |

|   |           |           |           |           |
|---|-----------|-----------|-----------|-----------|
| C | -1.965020 | 3.280889  | -1.131480 | -0.123800 |
| H | -2.095743 | 3.981006  | -1.952159 | 0.161568  |
| N | -1.007854 | 2.357380  | -1.283584 | 0.190625  |
| H | 0.398517  | -2.472789 | -0.081359 | 0.087414  |
| C | -0.678065 | -2.398032 | -0.218436 | 0.082941  |
| C | -1.304404 | -3.307187 | -1.248416 | -0.464425 |
| C | -1.378050 | -1.535784 | 0.553106  | 0.060951  |
| C | -2.822872 | -3.393779 | -1.089682 | -0.473364 |
| H | -0.860646 | -4.307839 | -1.178026 | 0.157480  |
| H | -1.070434 | -2.946705 | -2.262579 | 0.143289  |
| C | -2.879320 | -1.389673 | 0.419548  | -0.058255 |
| C | -3.403943 | -1.997673 | -0.880713 | -0.343369 |
| H | -3.066187 | -4.015232 | -0.217246 | 0.158829  |
| H | -3.268862 | -3.875825 | -1.965753 | 0.168406  |
| H | -3.169602 | -0.336355 | 0.476968  | 0.131853  |
| H | -3.346424 | -1.883184 | 1.283972  | 0.209173  |
| H | -4.497950 | -2.025854 | -0.857367 | 0.159163  |
| H | -3.113841 | -1.356498 | -1.724568 | 0.179347  |
| H | 0.789065  | -0.948885 | -3.673458 | 0.185212  |
| C | 1.327652  | -1.025332 | -2.730038 | 0.091186  |
| N | 1.960651  | -0.007189 | -2.303844 | -0.249795 |
| H | 1.287751  | -1.977465 | -2.192574 | 0.149216  |
| C | 2.682566  | -0.088263 | -1.084223 | -0.267664 |
| C | 3.352657  | -1.244703 | -0.667971 | -0.046300 |
| C | 2.738319  | 1.068423  | -0.297657 | -0.045261 |
| C | 4.039258  | -1.248471 | 0.544973  | 0.021290  |
| H | 3.358157  | -2.128499 | -1.298937 | 0.190843  |
| C | 3.414999  | 1.053779  | 0.919483  | -0.249729 |
| H | 2.235608  | 1.966838  | -0.647213 | 0.190058  |
| C | 4.065606  | -0.105423 | 1.345369  | -0.327103 |
| H | 4.561970  | -2.145845 | 0.861051  | 0.192422  |
| H | 3.438247  | 1.949461  | 1.532675  | 0.196840  |
| H | 4.600406  | -0.114752 | 2.289798  | 0.188985  |
| O | 1.004503  | 2.530115  | -3.340412 | -0.815483 |
| H | 0.264712  | 2.515530  | -2.699204 | 0.396685  |
| H | 1.493308  | 1.714436  | -3.127594 | 0.450429  |

E(RM062X) = -1094.85784648

frequencies 18.4701 23.5777 26.6300 37.3991 44.9982 50.1859



#### S.4.11 AN-ts12 in DMSO - EFS path

|   | X [Angs]  | Y [Angs]  | Z [Angs]  | q_Mul [e] |
|---|-----------|-----------|-----------|-----------|
| C | -0.158604 | -0.334125 | 3.342071  | -0.410789 |
| C | 1.010936  | -1.138997 | 2.787564  | -0.201120 |
| C | 1.622640  | -0.205560 | 1.727114  | -0.844321 |
| C | -0.735334 | 0.308189  | 2.084299  | 0.238037  |
| H | -0.893942 | -0.950294 | 3.862611  | 0.217963  |
| H | 0.199386  | 0.439656  | 4.028913  | 0.179366  |
| H | 0.642581  | -2.047046 | 2.296812  | 0.185955  |
| H | 1.753801  | -1.427814 | 3.533681  | 0.195704  |
| H | 2.341728  | 0.472355  | 2.205819  | 0.144935  |
| H | -1.266487 | 1.239056  | 2.291131  | 0.171357  |
| H | -1.411109 | -0.372902 | 1.554835  | 0.085871  |
| N | 0.459015  | 0.587448  | 1.260113  | 0.115285  |
| C | 2.332362  | -0.989158 | 0.647089  | -0.038832 |
| C | 1.627688  | -1.530630 | -0.428269 | -0.970222 |
| C | 4.299051  | -2.031331 | -0.252812 | -0.035811 |
| H | 0.563930  | -1.313370 | -0.540603 | 0.664073  |
| H | 5.360224  | -2.252007 | -0.224678 | 0.194419  |
| C | 3.698851  | -1.247664 | 0.729442  | 0.287506  |
| H | 4.287325  | -0.835578 | 1.546001  | 0.199376  |
| C | 3.509101  | -2.521684 | -1.289334 | -0.123535 |
| H | 3.944257  | -3.129390 | -2.078015 | 0.176391  |
| N | 2.196916  | -2.275750 | -1.381910 | 0.115352  |
| H | -1.520338 | 2.087286  | 0.501743  | 0.142641  |
| C | -0.601951 | 2.294353  | -0.039935 | -0.843761 |
| C | -0.499768 | 3.700314  | -0.613335 | -0.338947 |
| C | 0.546021  | 1.632914  | 0.425789  | 0.197353  |
| C | 0.914005  | 4.273652  | -0.521480 | -0.440930 |
| H | -1.209032 | 4.351323  | -0.092138 | 0.174314  |
| H | -0.806761 | 3.699073  | -1.671159 | 0.146323  |
| C | 1.913723  | 2.009785  | -0.089818 | 0.046011  |
| C | 1.905921  | 3.228142  | -1.017028 | -0.546615 |
| H | 1.147488  | 4.534574  | 0.519147  | 0.167258  |
| H | 0.986292  | 5.191216  | -1.113068 | 0.178041  |
| H | 2.359207  | 1.151070  | -0.603341 | 0.218971  |
| H | 2.553554  | 2.207381  | 0.781274  | 0.204301  |
| H | 2.920489  | 3.632028  | -1.075670 | 0.174300  |
| H | 1.626458  | 2.923464  | -2.033332 | 0.164594  |
| H | -0.167254 | 1.338531  | -2.215527 | 0.188320  |
| C | -1.059293 | 1.134470  | -1.619549 | -0.034949 |
| N | -1.284327 | -0.150630 | -1.352010 | -0.470891 |

|   |           |           |           |           |
|---|-----------|-----------|-----------|-----------|
| H | -1.887162 | 1.816984  | -1.844527 | 0.196843  |
| C | -2.486028 | -0.522768 | -0.763903 | -0.144933 |
| C | -3.506109 | 0.358709  | -0.342969 | -0.052008 |
| C | -2.681441 | -1.901014 | -0.522261 | 0.043931  |
| C | -4.658820 | -0.125410 | 0.276309  | -0.139827 |
| H | -3.409248 | 1.429076  | -0.495116 | 0.120321  |
| C | -3.832016 | -2.375002 | 0.094617  | -0.279420 |
| H | -1.897476 | -2.587376 | -0.833566 | 0.175795  |
| C | -4.835910 | -1.489803 | 0.501974  | -0.327532 |
| H | -5.425003 | 0.578599  | 0.590221  | 0.173028  |
| H | -3.948110 | -3.442235 | 0.262672  | 0.168543  |
| H | -5.734203 | -1.857575 | 0.987246  | 0.162854  |
| O | -0.108330 | -1.951006 | -3.158330 | -0.808390 |
| H | 0.725558  | -2.230161 | -2.742845 | 0.429788  |
| H | -0.520902 | -1.329645 | -2.508684 | 0.407709  |

E(RM062X) = -1094.84000817

frequencies -389.4486 15.3121 39.5817 42.6264 46.0555 56.1370

#### S.4.12 AN2 in DMSO - EFS path

|   | X [Angs]  | Y [Angs]  | Z [Angs]  | q_Mul [e] |
|---|-----------|-----------|-----------|-----------|
| C | -0.142780 | -0.266540 | 3.404122  | -0.364399 |
| C | 1.064080  | -1.032635 | 2.875410  | -0.357322 |
| C | 1.608369  | -0.137396 | 1.747922  | -0.677812 |
| C | -0.777288 | 0.263055  | 2.126107  | 0.165499  |
| H | -0.835475 | -0.895646 | 3.964587  | 0.229268  |
| H | 0.170923  | 0.565925  | 4.041385  | 0.188231  |
| H | 0.746349  | -1.991992 | 2.453705  | 0.187066  |
| H | 1.835837  | -1.222347 | 3.622933  | 0.207798  |
| H | 2.310651  | 0.595572  | 2.160044  | 0.195472  |
| H | -1.407162 | 1.135799  | 2.284578  | 0.197167  |
| H | -1.348641 | -0.508116 | 1.597175  | 0.098221  |
| N | 0.399730  | 0.624730  | 1.288474  | 0.226426  |
| C | 2.274488  | -0.935891 | 0.654798  | 0.024896  |
| C | 1.526685  | -1.523665 | -0.366697 | -0.701086 |
| C | 4.215242  | -1.964154 | -0.308097 | 0.028017  |
| H | 0.455749  | -1.326474 | -0.445521 | 0.677854  |
| H | 5.280656  | -2.163498 | -0.325654 | 0.196387  |
| C | 3.648942  | -1.161256 | 0.677573  | -0.083454 |
| H | 4.268130  | -0.712091 | 1.450336  | 0.202086  |
| C | 3.384208  | -2.500163 | -1.288897 | -0.170183 |
| H | 3.793430  | -3.122730 | -2.079889 | 0.177024  |

|   |           |           |           |           |
|---|-----------|-----------|-----------|-----------|
| N | 2.064558  | -2.282759 | -1.326568 | 0.118928  |
| H | -1.669154 | 1.941063  | 0.552205  | 0.087113  |
| C | -0.848483 | 2.169383  | -0.124508 | -0.674353 |
| C | -0.701864 | 3.703389  | -0.284134 | -0.411346 |
| C | 0.404691  | 1.518108  | 0.346774  | 0.202325  |
| C | 0.748342  | 4.186754  | -0.201384 | -0.387399 |
| H | -1.309717 | 4.206106  | 0.472581  | 0.185251  |
| H | -1.115019 | 3.981174  | -1.261980 | 0.167049  |
| C | 1.677308  | 1.856930  | -0.376326 | 0.270088  |
| C | 1.647950  | 3.258233  | -1.011399 | -0.654059 |
| H | 1.085543  | 4.195944  | 0.843992  | 0.174277  |
| H | 0.818230  | 5.213904  | -0.569629 | 0.190093  |
| H | 1.822327  | 1.082263  | -1.142685 | 0.292051  |
| H | 2.521598  | 1.768036  | 0.313908  | 0.174781  |
| H | 2.671687  | 3.636867  | -1.059683 | 0.196882  |
| H | 1.280309  | 3.204093  | -2.041613 | 0.152375  |
| H | -0.458198 | 1.796033  | -2.235222 | 0.163949  |
| C | -1.213380 | 1.478320  | -1.503747 | -0.499837 |
| N | -1.253915 | 0.053699  | -1.466694 | -0.591803 |
| H | -2.160559 | 1.962446  | -1.804876 | 0.176429  |
| C | -2.301670 | -0.540511 | -0.847143 | -0.017461 |
| C | -3.427386 | 0.118772  | -0.265484 | -0.007554 |
| C | -2.298755 | -1.966802 | -0.732433 | -0.011564 |
| C | -4.435407 | -0.594363 | 0.382669  | -0.112792 |
| H | -3.516593 | 1.199418  | -0.323598 | 0.127910  |
| C | -3.307927 | -2.657846 | -0.081649 | -0.310598 |
| H | -1.466866 | -2.507823 | -1.179970 | 0.153462  |
| C | -4.395908 | -1.984507 | 0.495310  | -0.344810 |
| H | -5.270111 | -0.043778 | 0.812014  | 0.156740  |
| H | -3.250216 | -3.742469 | -0.020502 | 0.155587  |
| H | -5.182853 | -2.527465 | 1.008127  | 0.154193  |
| O | 0.122366  | -1.215358 | -3.366726 | -0.798643 |
| H | 0.785572  | -1.744595 | -2.899012 | 0.413512  |
| H | -0.404718 | -0.745722 | -2.633148 | 0.462065  |

E(RM062X) = -1094.85011024

frequencies 14.6368 40.1152 47.3087 54.7893 61.4911 78.5661

### S.4.13 AN3 in DMSO - EFS path

|   | X [Angs]  | Y [Angs]  | Z [Angs]  | q_Mul [e] |
|---|-----------|-----------|-----------|-----------|
| C | 0.155429  | 0.082944  | 3.562146  | -0.405773 |
| C | 1.040999  | -1.018580 | 2.988634  | -0.295953 |
| C | 1.597983  | -0.421277 | 1.682812  | -0.994727 |
| C | -0.508802 | 0.656706  | 2.318255  | 0.133592  |
| H | -0.580692 | -0.290709 | 4.274869  | 0.224411  |
| H | 0.757562  | 0.855078  | 4.050337  | 0.187934  |
| H | 0.438948  | -1.903096 | 2.758635  | 0.170088  |
| H | 1.853737  | -1.321956 | 3.650023  | 0.214381  |
| H | 2.540277  | 0.100257  | 1.879498  | 0.171334  |
| H | -0.871860 | 1.672710  | 2.454221  | 0.188270  |
| H | -1.325970 | 0.022602  | 1.954154  | 0.141276  |
| N | 0.587728  | 0.627678  | 1.313069  | 0.390257  |
| C | 1.797063  | -1.461304 | 0.606523  | 0.808518  |
| C | 0.699216  | -2.080396 | 0.004807  | -1.015181 |
| C | 3.192850  | -2.918078 | -0.689303 | 0.165383  |
| H | -0.314457 | -1.756523 | 0.243586  | 0.308670  |
| H | 4.165912  | -3.280169 | -1.001410 | 0.205723  |
| C | 3.070108  | -1.891325 | 0.242743  | -0.184840 |
| H | 3.953254  | -1.431463 | 0.679768  | 0.193949  |
| C | 2.032100  | -3.477270 | -1.218329 | -0.204006 |
| H | 2.091872  | -4.285086 | -1.943084 | 0.172932  |
| N | 0.801180  | -3.069138 | -0.884982 | 0.138535  |
| H | -1.153692 | 2.400310  | 0.672709  | 0.117240  |
| C | -0.353639 | 2.413467  | -0.065084 | -0.255072 |
| C | 0.222708  | 3.847162  | -0.199029 | -0.420487 |
| C | 0.711405  | 1.427962  | 0.300472  | -0.192874 |
| C | 1.747610  | 3.868446  | -0.363907 | -0.388315 |
| H | -0.067355 | 4.440869  | 0.671353  | 0.182973  |
| H | -0.248526 | 4.311351  | -1.073937 | 0.175460  |
| C | 1.902011  | 1.361376  | -0.599891 | 0.159999  |
| C | 2.215120  | 2.720701  | -1.257928 | -0.525626 |
| H | 2.227575  | 3.766339  | 0.618768  | 0.173124  |
| H | 2.060879  | 4.833323  | -0.771775 | 0.187914  |
| H | 1.659203  | 0.594757  | -1.365218 | 0.367127  |
| H | 2.771792  | 1.008413  | -0.040959 | 0.137523  |
| H | 3.292869  | 2.778379  | -1.428755 | 0.202039  |
| H | 1.739568  | 2.794431  | -2.241530 | 0.144849  |
| H | -0.253588 | 2.173254  | -2.222280 | 0.156552  |
| C | -0.961250 | 1.927632  | -1.426250 | -0.743899 |
| N | -1.220467 | 0.523639  | -1.511715 | -0.356787 |

|   |           |           |           |           |
|---|-----------|-----------|-----------|-----------|
| H | -1.858591 | 2.541839  | -1.594604 | 0.197243  |
| C | -2.286517 | -0.061047 | -0.896191 | -0.165795 |
| C | -3.232407 | 0.643129  | -0.111895 | 0.131073  |
| C | -2.480591 | -1.461250 | -1.037168 | -0.138318 |
| C | -4.296138 | -0.022615 | 0.497385  | -0.074428 |
| H | -3.140266 | 1.716169  | 0.024049  | 0.131608  |
| C | -3.542628 | -2.106579 | -0.421180 | -0.158820 |
| H | -1.770483 | -2.023139 | -1.640677 | 0.175083  |
| C | -4.466740 | -1.399012 | 0.358923  | -0.344597 |
| H | -5.000063 | 0.553166  | 1.093070  | 0.168350  |
| H | -3.654522 | -3.180049 | -0.552070 | 0.170712  |
| H | -5.293985 | -1.908915 | 0.841076  | 0.158442  |
| O | 0.616619  | -0.509343 | -2.910914 | -0.970058 |
| H | 0.789822  | -1.419631 | -2.643666 | 0.385521  |
| H | -0.456603 | -0.047778 | -2.132719 | 0.497470  |

E(RM062X) = -1094.84327687

frequencies 18.1569 30.1087 39.7554 56.2751 64.4291 70.2714

#### S.4.14 AN-ts34 in DMSO - EFS path

|   | X [Angs]  | Y [Angs]  | Z [Angs]  | q_Mul [e] |
|---|-----------|-----------|-----------|-----------|
| C | -0.313857 | -0.856064 | 2.897973  | -0.301561 |
| C | 1.047432  | -1.472180 | 2.578941  | -0.307003 |
| C | 1.662747  | -0.526416 | 1.523755  | -0.098464 |
| C | -0.749595 | -0.347340 | 1.532463  | 0.133103  |
| H | -1.020745 | -1.578945 | 3.308069  | 0.221052  |
| H | -0.216850 | -0.019786 | 3.597185  | 0.182799  |
| H | 0.912679  | -2.469193 | 2.149088  | 0.171134  |
| H | 1.705263  | -1.562681 | 3.444518  | 0.210390  |
| H | 2.341706  | 0.177699  | 2.011381  | 0.131935  |
| H | -1.565943 | 0.370320  | 1.551318  | 0.158838  |
| H | -1.045819 | -1.178287 | 0.883571  | 0.075905  |
| N | 0.494768  | 0.256880  | 1.009305  | 0.454418  |
| C | 2.413567  | -1.262741 | 0.437954  | -0.488554 |
| C | 1.741924  | -2.109486 | -0.450231 | -0.710942 |
| C | 4.445852  | -1.907301 | -0.666085 | -0.056429 |
| H | 0.657967  | -2.202116 | -0.399315 | 0.364840  |
| H | 5.521667  | -1.855801 | -0.790319 | 0.202770  |
| C | 3.796527  | -1.165864 | 0.319017  | 0.628754  |
| H | 4.360156  | -0.515729 | 0.984190  | 0.222121  |
| C | 3.679722  | -2.717639 | -1.498173 | -0.083158 |
| H | 4.152017  | -3.308462 | -2.278498 | 0.180960  |

|   |           |           |           |           |
|---|-----------|-----------|-----------|-----------|
| N | 2.346961  | -2.822772 | -1.399525 | 0.035031  |
| H | -1.250125 | 2.104509  | 0.917489  | 0.170558  |
| C | -0.617322 | 2.202159  | 0.029133  | -0.433285 |
| C | -0.362781 | 3.717028  | -0.189086 | -0.438500 |
| C | 0.618353  | 1.365012  | 0.319892  | -1.035198 |
| C | 1.021742  | 4.218327  | 0.205192  | -0.388029 |
| H | -1.144869 | 4.271069  | 0.338244  | 0.185509  |
| H | -0.493191 | 3.934171  | -1.256616 | 0.151385  |
| C | 2.007430  | 1.943184  | 0.199431  | 0.638638  |
| C | 2.064728  | 3.319066  | -0.447463 | -0.598465 |
| H | 1.151652  | 4.203644  | 1.295686  | 0.160880  |
| H | 1.134524  | 5.257160  | -0.119125 | 0.180525  |
| H | 2.652540  | 1.228834  | -0.312524 | 0.141870  |
| H | 2.384296  | 2.044802  | 1.228713  | 0.206172  |
| H | 3.075160  | 3.718472  | -0.321525 | 0.179953  |
| H | 1.868865  | 3.238890  | -1.522545 | 0.175686  |
| H | -0.859099 | 1.987785  | -2.082186 | 0.202484  |
| C | -1.439293 | 1.712584  | -1.201336 | -0.683625 |
| N | -1.703313 | 0.308029  | -1.297119 | -0.375841 |
| H | -2.371721 | 2.287067  | -1.210321 | 0.175296  |
| C | -2.813867 | -0.340365 | -0.830880 | -0.220141 |
| C | -3.848019 | 0.316353  | -0.131602 | -0.035183 |
| C | -2.935147 | -1.734561 | -1.030580 | 0.113481  |
| C | -4.956289 | -0.395815 | 0.325333  | -0.117055 |
| H | -3.784002 | 1.381554  | 0.066982  | 0.126347  |
| C | -4.042320 | -2.429465 | -0.562262 | -0.161768 |
| H | -2.145900 | -2.257484 | -1.565552 | 0.165942  |
| C | -5.071179 | -1.769725 | 0.118449  | -0.410133 |
| H | -5.737748 | 0.138367  | 0.858901  | 0.177046  |
| H | -4.104410 | -3.500551 | -0.734193 | 0.176069  |
| H | -5.936180 | -2.315465 | 0.479832  | 0.152189  |
| O | 0.861879  | 0.487795  | -2.002287 | -0.800481 |
| H | 1.665177  | -0.041307 | -1.932954 | 0.394653  |
| H | -0.873133 | -0.188353 | -1.638821 | 0.495082  |

E(RM062X) = -1094.82978601

frequencies -134.4059 19.3854 37.6695 41.8606 54.9115 66.9387

#### S.4.15 AN-ts24 in DMSO - ZFR path

M06-2X/6-31G(d) optimized geometry

|   | X [Angs]  | Y [Angs]  | Z [Angs]  | q_Mul [e] |
|---|-----------|-----------|-----------|-----------|
| C | -2.013355 | 3.149711  | 0.991121  | -0.351349 |
| C | -1.805135 | 3.133801  | -0.523906 | -0.321247 |
| C | -1.137359 | 1.767160  | -0.761039 | -0.089239 |
| C | -2.500886 | 1.730882  | 1.277846  | -0.171393 |
| H | -1.065243 | 3.338845  | 1.503526  | 0.188351  |
| H | -2.736086 | 3.899748  | 1.314627  | 0.203247  |
| H | -1.183809 | 3.951839  | -0.892627 | 0.199291  |
| H | -2.769218 | 3.162506  | -1.041391 | 0.194694  |
| H | -1.348692 | 1.392949  | -1.766353 | 0.217384  |
| H | -3.587880 | 1.656007  | 1.181420  | 0.210461  |
| H | -2.175619 | 1.306908  | 2.232357  | 0.220640  |
| N | -1.858304 | 0.916023  | 0.220934  | -0.434981 |
| C | 0.356327  | 1.827451  | -0.532651 | 0.081324  |
| C | 0.949798  | 1.401342  | 0.654593  | -0.005375 |
| C | 2.534258  | 2.516463  | -1.260016 | -0.190268 |
| H | 0.351113  | 0.878119  | 1.400574  | 0.167625  |
| H | 3.207246  | 2.938651  | -1.998126 | 0.194537  |
| C | 1.176199  | 2.391023  | -1.512512 | -0.168462 |
| H | 0.753111  | 2.725629  | -2.457100 | 0.198503  |
| C | 3.018562  | 2.095122  | -0.021072 | 0.025690  |
| H | 4.074988  | 2.198191  | 0.216849  | 0.178153  |
| N | 2.251535  | 1.553284  | 0.923457  | -0.454402 |
| H | -0.402828 | -0.547044 | -1.299282 | 0.179142  |
| C | -1.184722 | -1.164022 | -0.847684 | -0.221150 |
| C | -2.261148 | -1.511463 | -1.911372 | -0.314463 |
| C | -1.903556 | -0.382919 | 0.218956  | 0.476629  |
| C | -3.474092 | -2.224360 | -1.302433 | -0.314920 |
| H | -1.792443 | -2.128941 | -2.685060 | 0.186193  |
| H | -2.596480 | -0.586862 | -2.398814 | 0.173752  |
| C | -2.999040 | -1.108587 | 0.933650  | -0.345505 |
| C | -4.067781 | -1.425409 | -0.139246 | -0.324043 |
| H | -3.188586 | -3.222630 | -0.951669 | 0.172442  |
| H | -4.232315 | -2.371016 | -2.078023 | 0.179375  |
| H | -3.409952 | -0.521041 | 1.751616  | 0.199816  |
| H | -2.598724 | -2.024785 | 1.368350  | 0.205586  |
| H | -4.886358 | -1.976902 | 0.332110  | 0.187941  |
| H | -4.487755 | -0.483469 | -0.516376 | 0.167561  |
| C | 2.218859  | -1.653253 | -0.994553 | -0.226294 |
| C | 1.779589  | -1.833001 | 0.332211  | 0.304336  |

|   |           |           |           |           |
|---|-----------|-----------|-----------|-----------|
| C | 2.726358  | -1.631791 | 1.360865  | -0.210625 |
| C | 4.034532  | -1.275602 | 1.078333  | -0.177829 |
| C | 4.461339  | -1.106359 | -0.241465 | -0.200875 |
| C | 3.539073  | -1.297423 | -1.266143 | -0.190037 |
| H | 1.528976  | -1.783013 | -1.823060 | 0.151356  |
| H | 2.401212  | -1.768150 | 2.389652  | 0.148811  |
| H | 4.733768  | -1.129213 | 1.897784  | 0.159426  |
| H | 5.487371  | -0.829952 | -0.462540 | 0.154643  |
| H | 3.843869  | -1.163974 | -2.301237 | 0.160002  |
| N | 0.506640  | -2.228320 | 0.696150  | -0.716184 |
| C | -0.507052 | -2.444223 | -0.301902 | -0.174842 |
| H | -0.097813 | -2.984367 | -1.164547 | 0.171847  |
| H | -1.268264 | -3.101285 | 0.130575  | 0.169861  |
| O | -0.804375 | -0.786448 | 2.426496  | -0.941472 |
| H | 0.072879  | -1.686644 | 1.538625  | 0.374578  |
| H | -0.135185 | -0.262677 | 2.892895  | 0.341756  |

E(RM062X) = -1094.76140562

frequencies -78.5759 23.6230 41.5079 61.3054 64.0677 76.6106

M06-2X/6-31G++(d,p) single point energy calculation

E(RM062X) = -1094.84248860

frequencies -16.6249 35.0818 44.2772 46.6685 58.9007 76.0659

#### S.4.16 AN4 in DMSO - EFS path

|   | X [Angs]  | Y [Angs]  | Z [Angs]  | q_Mul [e] |
|---|-----------|-----------|-----------|-----------|
| C | 0.635972  | -0.253065 | 3.112339  | -0.498274 |
| C | 1.925479  | -0.810010 | 2.515704  | -0.203081 |
| C | 2.047779  | -0.029936 | 1.194714  | -0.973207 |
| C | -0.254587 | -0.170111 | 1.872378  | 0.414869  |
| H | 0.211819  | -0.882081 | 3.898649  | 0.196602  |
| H | 0.809474  | 0.748716  | 3.523174  | 0.174488  |
| H | 1.809474  | -1.879837 | 2.303635  | 0.163589  |
| H | 2.810271  | -0.680356 | 3.143587  | 0.196356  |
| H | 2.536603  | 0.931900  | 1.420442  | -0.007242 |
| H | -1.062797 | 0.557862  | 1.977673  | 0.159195  |
| H | -0.728079 | -1.144555 | 1.686700  | 0.110073  |
| N | 0.652827  | 0.167481  | 0.751151  | 0.126518  |
| C | 2.901757  | -0.748253 | 0.173822  | 0.774288  |
| C | 2.432209  | -1.896439 | -0.471153 | -0.798417 |



|   |           |           |           |           |
|---|-----------|-----------|-----------|-----------|
| C | 4.950356  | -1.059708 | -1.046890 | 0.167216  |
| H | 1.427017  | -2.255370 | -0.256863 | 0.319758  |
| H | 5.959467  | -0.760357 | -1.308517 | 0.192430  |
| C | 4.195915  | -0.332781 | -0.127874 | 0.182728  |
| H | 4.608537  | 0.555748  | 0.345468  | 0.191773  |
| C | 4.379342  | -2.185395 | -1.632756 | -0.171626 |
| H | 4.937785  | -2.774868 | -2.355374 | 0.174754  |
| N | 3.138750  | -2.607089 | -1.352529 | -0.005015 |
| H | -1.743811 | 1.241852  | 0.060790  | 0.095870  |
| C | -0.950682 | 1.393469  | -0.684394 | 0.171077  |
| C | -1.229832 | 2.721482  | -1.398903 | -0.014285 |
| C | 0.397420  | 1.454672  | 0.068118  | -2.558111 |
| C | -1.201802 | 3.909761  | -0.437904 | -0.377387 |
| H | -2.207834 | 2.656865  | -1.891184 | 0.153167  |
| H | -0.480865 | 2.865723  | -2.188357 | 0.181099  |
| C | 0.427673  | 2.666738  | 1.020592  | 0.421038  |
| C | 0.135467  | 3.984099  | 0.297641  | -0.523753 |
| H | -2.011131 | 3.796447  | 0.297245  | 0.165871  |
| H | -1.390964 | 4.841721  | -0.981124 | 0.163401  |
| H | 1.403144  | 2.714816  | 1.521166  | 0.170746  |
| H | -0.322406 | 2.516688  | 1.806411  | 0.162058  |
| H | 0.130945  | 4.805115  | 1.022277  | 0.161644  |
| H | 0.935679  | 4.197997  | -0.421856 | 0.144617  |
| H | 0.004766  | 0.095231  | -2.123134 | 0.173769  |
| C | -0.985539 | 0.217108  | -1.676062 | 0.118817  |
| N | -1.366099 | -1.066969 | -1.108248 | -0.328739 |
| H | -1.671781 | 0.449812  | -2.498208 | 0.174052  |
| C | -2.648811 | -1.279568 | -0.618897 | -0.147245 |
| C | -3.731970 | -0.443123 | -0.943228 | -0.283118 |
| C | -2.898743 | -2.402769 | 0.195422  | 0.253927  |
| C | -5.015251 | -0.737953 | -0.481245 | -0.178710 |
| H | -3.579680 | 0.441631  | -1.552486 | 0.116605  |
| C | -4.179608 | -2.681357 | 0.653810  | -0.292972 |
| H | -2.071891 | -3.060730 | 0.453441  | 0.161737  |
| C | -5.255479 | -1.853240 | 0.317594  | -0.323113 |
| H | -5.834040 | -0.076112 | -0.749119 | 0.176206  |
| H | -4.340683 | -3.555634 | 1.278237  | 0.167993  |
| H | -6.255649 | -2.073311 | 0.675448  | 0.152932  |
| O | 1.391429  | 1.614360  | -0.933530 | -0.347887 |
| H | 2.179620  | 2.020905  | -0.551520 | 0.469719  |
| H | -0.635163 | -1.446385 | -0.517933 | 0.531201  |

E(RM062X) = -1094.89193079

frequencies 15.5880 35.7980 39.7191 47.0590 52.3791 68.1000

## S.5 Alcohols as solvent

### S.5.1 ZBS - Aminol formation

DMSO data

Cartesian coordinates (standard orientation)

|   |           |           |           |
|---|-----------|-----------|-----------|
| C | 1.045701  | 1.221709  | 3.327484  |
| C | -0.216925 | 1.654985  | 2.591392  |
| C | -0.123112 | 0.931053  | 1.235686  |
| C | 2.092367  | 1.222101  | 2.220730  |
| H | 1.314597  | 1.891148  | 4.146225  |
| H | 0.935165  | 0.206277  | 3.719487  |
| H | -0.206022 | 2.737747  | 2.426465  |
| H | -1.144913 | 1.395575  | 3.104999  |
| H | -0.576976 | -0.062520 | 1.310816  |
| H | 2.910457  | 0.535213  | 2.421413  |
| H | 2.480551  | 2.227557  | 2.020799  |
| N | 1.341726  | 0.746678  | 1.036850  |
| C | -0.806271 | 1.714084  | 0.140696  |
| C | -0.161966 | 2.735658  | -0.560826 |
| C | -2.775184 | 2.227363  | -1.128441 |
| H | 0.885774  | 2.958274  | -0.360173 |
| H | -3.813555 | 2.055496  | -1.391086 |
| C | -2.144932 | 1.461340  | -0.153388 |
| H | -2.677013 | 0.663952  | 0.362244  |
| C | -2.038631 | 3.216962  | -1.776776 |
| H | -2.498060 | 3.828737  | -2.548808 |
| N | -0.753429 | 3.473713  | -1.504497 |
| H | 0.112293  | -0.020388 | -1.079451 |
| C | 1.098145  | -0.489686 | -1.079709 |
| C | 1.850333  | -0.036757 | -2.345294 |
| C | 1.893476  | 0.010528  | 0.109910  |
| C | 3.225424  | -0.711991 | -2.480246 |
| H | 1.966619  | 1.053541  | -2.314639 |
| H | 1.225646  | -0.257899 | -3.216644 |
| C | 3.392767  | 0.035057  | -0.042560 |
| C | 3.900491  | -0.930579 | -1.110070 |
| H | 3.860859  | -0.091192 | -3.118651 |
| H | 3.119305  | -1.675347 | -2.989307 |
| H | 3.863697  | -0.184770 | 0.914125  |
| H | 3.656779  | 1.070649  | -0.309665 |

|   |           |           |           |
|---|-----------|-----------|-----------|
| H | 4.983947  | -0.814782 | -1.196963 |
| H | 3.727272  | -1.949635 | -0.751473 |
| H | 1.777376  | -2.564662 | -1.011246 |
| C | 0.838964  | -2.016016 | -1.097309 |
| N | -0.017353 | -2.458124 | -0.021754 |
| H | 0.410264  | -2.261031 | -2.075210 |
| C | -1.363377 | -2.152035 | -0.002138 |
| C | -2.103955 | -1.827512 | -1.157953 |
| C | -2.056969 | -2.195158 | 1.228624  |
| C | -3.475201 | -1.586586 | -1.079533 |
| H | -1.613949 | -1.762963 | -2.123989 |
| C | -3.421713 | -1.942601 | 1.293874  |
| H | -1.500938 | -2.436778 | 2.131812  |
| C | -4.150769 | -1.639251 | 0.138689  |
| H | -4.016761 | -1.340762 | -1.989042 |
| H | -3.922049 | -1.983582 | 2.257477  |
| H | -5.216561 | -1.443992 | 0.191101  |
| O | 1.975326  | -1.831592 | 1.614588  |
| H | 2.629074  | -2.530210 | 1.480060  |
| H | 0.535928  | -2.342776 | 0.861368  |

SCF energy : -1094.84298427

Gibbs free energy: -1094.414184

Frequencies

|           |          |          |          |          |          |          |
|-----------|----------|----------|----------|----------|----------|----------|
| -154.4011 | 34.9212  | 42.9970  | 51.5635  | 62.9796  | 67.5284  | 75.6114  |
| 84.1267   | 103.0055 | 119.8406 | 135.7593 | 154.0087 | 180.0439 | 184.6341 |

water data

SCF energy : -1094.84338404

Gibbs free energy: -1094.414528

Frequencies

|           |          |          |          |          |          |          |
|-----------|----------|----------|----------|----------|----------|----------|
| -153.2751 | 34.7580  | 43.7776  | 51.5834  | 63.2069  | 67.5436  | 75.9962  |
| 84.4239   | 102.9200 | 121.3193 | 135.9675 | 154.2870 | 180.1724 | 184.7017 |

methanol data

SCF energy : -1094.84256122

Gibbs free energy: -1094.413816

Frequencies

|           |          |          |          |          |          |          |
|-----------|----------|----------|----------|----------|----------|----------|
| -155.6031 | 35.0188  | 42.2206  | 51.5274  | 62.7011  | 67.5204  | 75.2413  |
| 83.9104   | 103.0059 | 118.5080 | 135.5385 | 153.7472 | 179.9351 | 184.5752 |

ethanol data

SCF energy : -1094.84213623

Gibbs free energy: -1094.413442

Frequencies

|           |          |          |          |          |          |          |
|-----------|----------|----------|----------|----------|----------|----------|
| -156.8527 | 35.0712  | 41.4498  | 51.5016  | 62.3571  | 67.5141  | 74.8903  |
| 83.7367   | 103.1425 | 117.3988 | 135.3375 | 153.5222 | 179.8143 | 184.5000 |

n-propanol data

SCF energy : -1094.84176796

Gibbs free energy: -1094.413115

Frequencies

|           |          |          |          |          |          |          |
|-----------|----------|----------|----------|----------|----------|----------|
| -157.8986 | 35.0387  | 40.8646  | 51.4592  | 62.0647  | 67.5079  | 74.6237  |
| 83.6264   | 103.2083 | 116.5964 | 135.1739 | 153.3517 | 179.7201 | 184.4441 |

## S.5.2 EBR - Aminol formation

Cartesian coordinates (standard orientation)

|   |           |           |           |
|---|-----------|-----------|-----------|
| C | -0.379571 | -2.615150 | 0.364715  |
| C | 1.134539  | -2.722290 | 0.533328  |
| C | 1.593748  | -1.257426 | 0.667788  |
| C | -0.517329 | -1.396734 | -0.538423 |
| H | -0.826436 | -3.506233 | -0.079980 |
| H | -0.866388 | -2.413019 | 1.324235  |
| H | 1.581092  | -3.166978 | -0.362767 |
| H | 1.446577  | -3.309584 | 1.398720  |
| H | 1.551455  | -0.943271 | 1.716978  |
| H | -1.499541 | -0.936310 | -0.484562 |
| H | -0.285461 | -1.645592 | -1.581078 |
| N | 0.528484  | -0.484129 | -0.024150 |
| C | 2.972911  | -1.029366 | 0.097146  |
| C | 3.173188  | -0.859333 | -1.275107 |

|   |           |           |           |
|---|-----------|-----------|-----------|
| C | 5.355566  | -0.883502 | 0.346755  |
| H | 2.317291  | -0.835212 | -1.948959 |
| H | 6.253402  | -0.883490 | 0.954622  |
| C | 4.096969  | -1.038917 | 0.920168  |
| H | 3.986665  | -1.159802 | 1.995184  |
| C | 5.441960  | -0.716380 | -1.033519 |
| H | 6.408762  | -0.586982 | -1.512564 |
| N | 4.373234  | -0.701082 | -1.839305 |
| H | -1.082651 | 0.885700  | -1.400271 |
| C | -0.682196 | 1.557476  | -0.634396 |
| C | 0.010947  | 2.736034  | -1.346444 |
| C | 0.393107  | 0.807119  | 0.136733  |
| C | 0.606456  | 3.754656  | -0.358520 |
| H | -0.717245 | 3.219843  | -2.005229 |
| H | 0.799004  | 2.338277  | -1.996324 |
| C | 1.555809  | 1.621223  | 0.641807  |
| C | 1.166225  | 3.072604  | 0.907083  |
| H | -0.152516 | 4.489250  | -0.071292 |
| H | 1.400087  | 4.310070  | -0.867226 |
| H | 2.331913  | 1.586816  | -0.137737 |
| H | 1.972933  | 1.154224  | 1.534965  |
| H | 0.427755  | 3.085713  | 1.714197  |
| H | 2.042646  | 3.612759  | 1.274154  |
| C | -3.940239 | 0.347563  | -1.020322 |
| C | -3.438512 | 0.159168  | 0.282789  |
| C | -3.818238 | -1.015889 | 0.970328  |
| C | -4.655771 | -1.952924 | 0.381440  |
| C | -5.153675 | -1.756483 | -0.911631 |
| C | -4.787435 | -0.599920 | -1.597490 |
| H | -3.665784 | 1.228132  | -1.592180 |
| H | -3.431970 | -1.176651 | 1.974084  |
| H | -4.923072 | -2.847884 | 0.936581  |
| H | -5.809112 | -2.489360 | -1.370096 |
| H | -5.158550 | -0.427382 | -2.604160 |
| N | -2.605370 | 1.053218  | 0.924018  |
| C | -1.877432 | 2.072985  | 0.207591  |
| H | -2.533949 | 2.629153  | -0.471079 |
| H | -1.514065 | 2.787049  | 0.949357  |
| O | -0.425535 | 0.537633  | 2.283778  |
| H | -1.941565 | 0.667039  | 1.645333  |
| H | -0.287605 | 1.249528  | 2.922016  |

SCF energy : -1094.84126088  
Gibbs free energy: -1094.413621

Frequencies

|           |          |          |          |          |          |          |
|-----------|----------|----------|----------|----------|----------|----------|
| -215.4836 | 24.3924  | 32.2234  | 38.9939  | 45.2953  | 61.7845  | 70.4057  |
| 78.9617   | 114.1904 | 123.5633 | 158.5068 | 172.3708 | 182.6530 | 191.7503 |

water data

SCF energy : -1094.84163873  
Gibbs free energy: -1094.413971

Frequencies

|           |          |          |          |          |          |          |
|-----------|----------|----------|----------|----------|----------|----------|
| -214.5633 | 25.4576  | 32.2782  | 39.0153  | 45.2659  | 61.7566  | 70.7953  |
| 79.1939   | 113.4630 | 123.3925 | 158.3644 | 172.3756 | 182.6391 | 191.7035 |

methanol data

SCF energy : -1094.84086032  
Gibbs free energy: -1094.413246

Frequencies

|           |          |          |          |          |          |          |
|-----------|----------|----------|----------|----------|----------|----------|
| -216.2707 | 23.3748  | 32.1925  | 38.9772  | 45.3389  | 61.8165  | 70.0124  |
| 78.7680   | 114.9479 | 123.7586 | 158.6545 | 172.3804 | 182.6709 | 191.8041 |

ethanol data

SCF energy : -1094.84045721  
Gibbs free energy: -1094.412861

Frequencies

|           |          |          |          |          |          |          |
|-----------|----------|----------|----------|----------|----------|----------|
| -217.1154 | 22.4884  | 32.1779  | 38.9818  | 45.3979  | 61.8583  | 69.7546  |
| 78.6156   | 115.6290 | 123.9610 | 158.7936 | 172.4064 | 182.6578 | 191.8520 |

n-propanol data

SCF energy : -1094.84010733  
Gibbs free energy: -1094.412564

### Frequencies

|           |          |          |          |          |          |          |
|-----------|----------|----------|----------|----------|----------|----------|
| -220.7393 | 21.8308  | 32.0951  | 38.9969  | 45.9204  | 61.8782  | 67.2331  |
| 78.3625   | 115.9116 | 124.1616 | 159.1979 | 172.3108 | 182.4507 | 192.3447 |

## S.6 MD data for the transition NE2 to NE3

*Ab initio* molecular dynamics

- RHF/3-21G, PCM model for DMSO
- Berendsen thermostat, 375 °C, 300 fs coupling constant
- Step size 1 fs; 14.5 ps simulation; 2.5 ps initial equilibration
- The N atoms hardly attract the H<sub>2</sub>O molecule.
- The H<sub>2</sub>O molecule can escape from aminol.
- The H<sub>2</sub>O molecule partially detaches and moves to the over side.
- water\_flip\_very\_short.mov shows the movement of the H<sub>2</sub>O molecule.
